# Supplementary material for: Vergaande P- en N-verwijdering met terugwinning van fosfaat.
Source: MDPI journal article supplement (doi:10.3390/cells12192340), 1988-01-01

**Figure S1.** Presentation of CC, CT and TT genotypes appears in rs4986791 SNP using in 3% agarose gel.

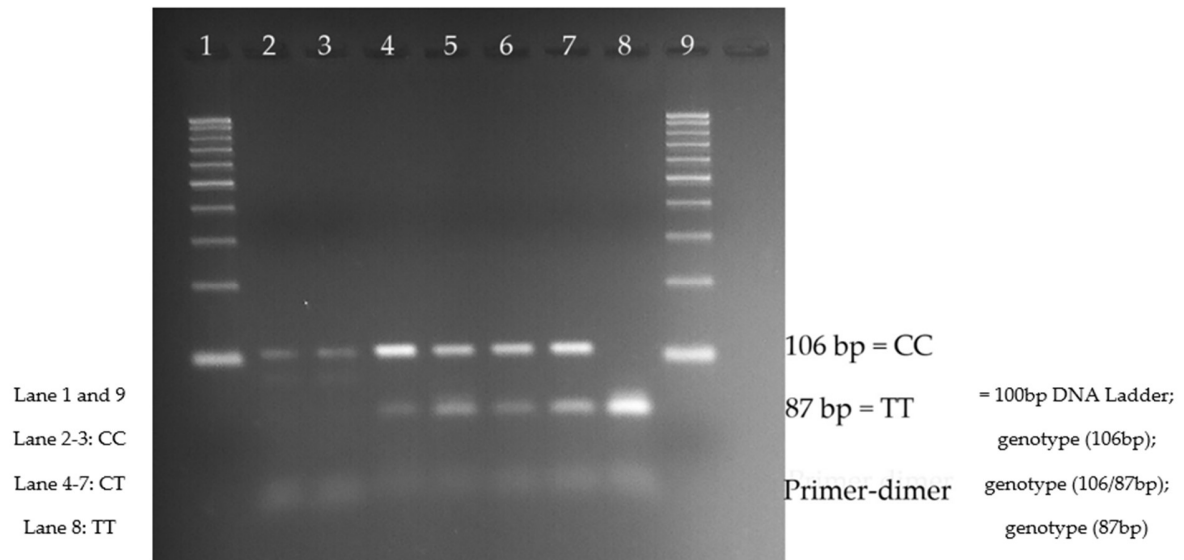

**Table S1.** List of *TLR4* SNPs and primer details are presented in this study.

| Position | rs number  | SNP         | Location | Forward Primer             | Reverse Primer          | PCR Size | Annealing Temperature | Restriction Enzyme             | Digested Products     |
|----------|------------|-------------|----------|----------------------------|-------------------------|----------|-----------------------|--------------------------------|-----------------------|
| G7263C   | rs11536889 | G- <u>A</u> | 3'UTR    | GCAGGAAGGAAGTGGGATGAC      | TGTTTCTGAGGAGCTGGATG    | 391bp    | 64°C                  | -                              | -                     |
| A896G    | rs4986790  | A- <u>G</u> | Exon-3   | AGCATACTTAGACTACTACCTCCATG | GAGAGATTGAGTTTCAATGTGGG | 200bp    | 56°C                  | -                              | -                     |
| C1196T   | rs4986791  | C- <u>T</u> | Exon-3   | CTCAAAGTGATTTTGGGAGAA      | AGATGTTCTAGTTGTTCTAAGCC | 106bp    | 60°C                  | HinfI<br>(G <sup>+</sup> AATC) | C-106bp;<br>T-87/19bp |

**Figure S2.** Performed validation for rs11536889 and rs4986790 SNPs via Sanger sequencing.

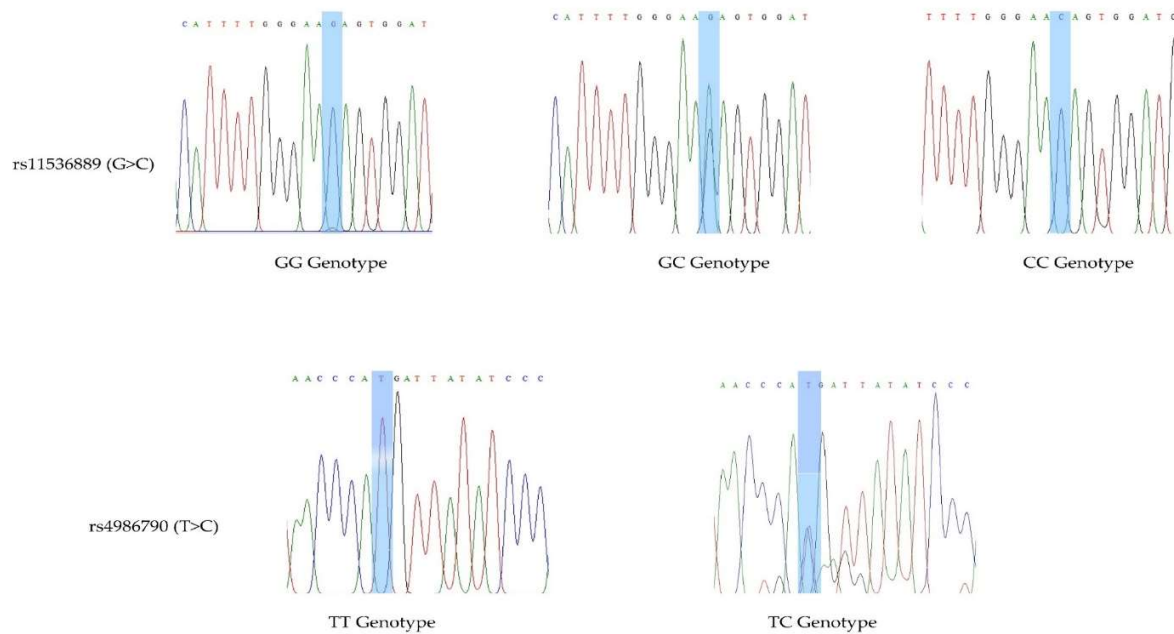

Supplement: s1 [file s1]
